## Retraction of: P495 contamination of wind instruments: A potential threat to musicians

Retraction of: H. Zeynep Cilingir, M. Burcin Mutlu, Volkan Kilic, Nilgün Poyraz, Halil Eryilmaz, P495 Contamination of wind instruments: A potential threat to musicians, Medical Mycology, Volume 60, Issue Supplement\_1, September 2022, myac072P495, <https://doi.org/10.1093/mmy/myac072.P495>

This abstract was erroneously transmitted to the journal by the conference organizers as part of the ISHAM Congress 2022 proceedings. It is being retracted at the request of the individuals, as the material was not presented as part of the conference.
